1 ***Sero-prevalence of brucellosis, Q-fever and Rift Valley Fever in humans and livestock in***  
2 ***Somali region, Ethiopia***

3 Mohammed Ibrahim<sup>1,2,3\*</sup>, Esther Schelling<sup>2,3</sup>, Jakob Zinsstag<sup>2,3</sup>, Jan Hattendorf<sup>2,3</sup>, Emawayish Andargie<sup>4</sup>, Rea  
4 Tschopp<sup>2,3,4</sup>

5 1 College of Veterinary Medicine, Jigjiga University, Jigjiga, Ethiopia

6 2 Department of Epidemiology and Public Health, Swiss Tropical and Public Health Institute

7 3 University of Basel, Basel, Switzerland

8 4 Armauer Hansen Research Institute, Addis Ababa, Ethiopia

9 \*Corresponding author

10 E-mail: [mohammed.abdikadir@swisstph.ch](mailto:mohammed.abdikadir@swisstph.ch) (MI)

11 These authors contributed equally to this work.

12 EA contributed only in laboratory work.

13 **Abstract**

14 Information on zoonotic diseases in humans and livestock are limited in pastoral/agro-pastoral  
15 communities in Ethiopia. A multi-stage cross sectional cluster design study was implemented with the  
16 aim to establish the seroprevalence of zoonotic diseases including brucellosis, Q-fever and Rift Valley  
17 Fever (RVF) in humans and livestock in Adadle woreda of the Somali region, Ethiopia. Blood samples  
18 were collected from humans and livestock and tested by relevant serological tests. For brucellosis,  
19 Rose Bengal test (RBT) and indirect ELISA was used for screening and confirmatory diagnosis  
20 respectively. Indirect and competitive ELISA were also used for Q-fever and RVF respectively. The  
21 individual seropositivity of Q-fever in livestock was 9.6% (95% CI 5.9-15.1) in cattle, 55.7% (95% CI  
22 46.0-65.0) in camels, 48.8% (95% CI 42.5-55.0) in goats, and 28.9% (95% CI 25.0-33.2) in sheep. In  
23 humans, seropositivity of Q-fever was 27.0% (95% CI 20.4-34.0), with prevalence in males of 28.9% vs  
24 24.2% in females (OR= 1.3; 95% CI 0.6-2.5). Camel seropositivity of Q-fever was significantly associated  
25 with age (OR= 8.1; 95% CI 2.8-23.7). The individual apparent seroprevalence of RVF was 13.2% (95%

26 CI 8.7-18.8) in humans, 17.9 % (95% CI 11.0-27.8) in cattle, 42.6% (95% CI 34.8-50.7) in camels, 6.3%  
27 (95% CI 3.3-11.6) in goats and 7.4% (95% CI 4.7-11.5) in sheep. Camels had the highest seropositivity  
28 of both Q-fever (55.7%; 95% CI 46.0-65.0) and RVF (42.6%; 95% CI 34.8-50.7). Only a weak correlation  
29 was observed between human and livestock seropositivity for both Q-fever and RVF. Only cattle and  
30 camels were seropositive for brucellosis by iELISA. The individual seroprevalence of brucellosis was  
31 2.8(0.9-6.4) in humans, 1.5% (95% CI 0.2-5.2) in cattle and 0.6% (95% CI 0.0-3.2) in camels. This study  
32 showed the importance of zoonoses in Somali regional state and is the first published study to describe  
33 RVF exposure in humans and livestock in the country. Collaboration between public and animal health  
34 sectors for further investigation on these zoonoses using the One Health concept is indispensable.

35 Key words: Humans; Livestock; Seroprevalence; Somali Region; Zoonotic Diseases

## 36 **1. Introduction**

37 Zoonoses are infectious diseases transmitted between human and vertebrate animals. These diseases  
38 include those from animal sources food. The international communities do not address neglected  
39 zoonotic diseases (NZDs) adequately [1]. Brucellosis, Q-fever and Rift Valley Fever are among those  
40 NZDs, which are largely eliminated in developed countries but under-diagnosed and under-reported  
41 in developing countries [2]. Effective management of zoonoses benefits from a One Health approach,  
42 creating synergistic benefits from the collaboration of human and animal health sectors [3]. Ethiopia  
43 is among the top five countries with the highest zoonotic infections in the world [4]. Despite its  
44 burden, attention by the government rose only recently, where the five most prevalent zoonotic  
45 diseases were prioritized as following: Rabies, anthrax, brucellosis, leptospirosis and echinococcosis  
46 [5].

47

48

49 Brucellosis is one of the neglected bacterial zoonoses, which have economic importance globally [6].  
50 This disease is caused by the genus *Brucella*. The economically most important species are *B.*  
51 *melitensis* and *B. abortus* having a high potential of human infection [3] affecting small ruminants and  
52 cattle respectively [7]. Transmission from animals to humans occurs usually due to consumption of  
53 unpasteurized milk and milk products or direct contact with infected animal especially during  
54 parturition, with direct contact with placentas or aborted fetuses [8]. Human brucellosis causes a flu-  
55 like illness with a fever, weakness, malaise, myalgia and weight loss. It can be debilitating in chronic  
56 stages with serious complications (e.g. endocarditis, musculoskeletal lesions) which can be potentially  
57 fatal if not treated. In livestock, *Brucella* spp cause abortion, infertility, and consequently, reduction  
58 of milk yields [7]. Human brucellosis infection shows non-specific symptoms and remains generally  
59 unnoticed or undiagnosed by medical doctors due to overlapping with other febrile illnesses [9].  
60 Brucellosis occurs globally with high incidences in the Middle East [10].

61 In Ethiopia, livestock brucellosis is endemic and was reported in different studies [11-15]. Most studies  
62 were done in the highlands targeting urban and peri-urban dairy farms. Seroprevalence of cattle in  
63 extensive production systems is lower than that of intensive production systems [16]. The highest  
64 prevalence of brucellosis was recorded in central Ethiopia followed by the southern part, whereby  
65 lower prevalences were seen in the western and eastern parts. Camel seropositivity for brucellosis in  
66 Ethiopia ranged from 0.7 to 12% for the Rose Bengal Plate Test (RBPT) and 0.5 -10% for Complement  
67 Fixation Test (CFT) in different agro-ecologies [14]. Studies on human brucellosis in Ethiopia are sparse  
68 with less information about risk factors for human infection [13, 17].

69 Q-fever is a zoonotic disease caused by *Coxiella burnetii*, which is endemic worldwide except in New  
70 Zealand and Antarctica. It affects a wide range of mammals, birds and arthropods [18]. Domestic  
71 ruminants such as cattle, goats and sheep are the main reservoirs for Q-fever in humans [19]. Human  
72 infection occurs due to inhalation of dust contaminated by infected animal fluids, consumption of  
73 unpasteurized dairy products and contact with milk, urine, faeces, vaginal mucus or semen of infected  
74 animals. The most common sign of Q-fever in man is a flu-like illness, which can progress to an atypical

75 pneumonia, resulting in a life threatening acute respiratory distress syndrome [20]. Infection in  
76 animals is predominantly asymptomatic but has been associated with late abortions, stillbirth, delivery  
77 of weak offspring and infertility [21].

78 Even though Q-fever have been given attention in developed countries, there are significant gaps in  
79 understanding the epidemiology of Q-fever infections in Africa [21]. Q-fever seropositivity among  
80 integrated human and animal studies was 13%, 23%, 33% and 16% in Egypt and 4%, 13%, 11% and 1%  
81 in Chad in cattle, goats, sheep and humans respectively [22, 23]. The seropositivity of Q-fever in camels  
82 was 80% in Chad and being a camel breeder was a risk factor of human seropositivity [23]. In Togo,  
83 people of Fulani ethnicity had greater livestock contact and a significantly higher seroprevalence than  
84 other ethnic groups (46% in Fulani vs 27% in non-Fulani) [20]. Reports of Q-fever sero-prevalence in  
85 various livestock species in Kenya, Ethiopia and Cote d'Ivoire varied between 9% and 90% while in  
86 humans it varied between 3% and 7% [2, 11, 21, 24].

87 Rift Valley Fever (RVF) is a peracute or acute zoonotic disease affecting ruminants and humans. It is  
88 caused by a mosquitoes borne virus of the Bunyaviridae family; genus *Phlebovirus* [25]. Rift Valley  
89 Fever epidemics in East Africa occur often when there is a heavy rainfall followed by flooding in arid  
90 and semi-arid areas favoring the massive hatching of mosquitoes eggs, whereof a part is already  
91 transovarially infected, and thus lead to rapid spread of the virus to animals and to a lesser extent to  
92 humans [26]. The majority of animal infections are due to bites of infected mosquitoes. In humans,  
93 RVF-Virus is transmitted by direct contact with infectious animal tissue or by the bites of infected  
94 mosquitoes [27]. The disease in ruminants and camels is characterized by abortion, neonatal  
95 mortality, weak-born offspring and liver damage in animals. In humans, most infections are  
96 asymptomatic or as a mild (flue-like) illness. In severe disease (about 7-8% of cases), it causes  
97 hemorrhage, encephalitis, visual disturbances and death [28].

98

99 Reports of RVF sero-prevalence in various livestock species in Kenya, Cote d'Ivoire, Chad, Tanzania and  
100 Western Sahara varied between 0% and 38% while in humans it was 0.8% [2, 29-32].

101 The ability of RVF to spread outside traditionally endemic countries, even out of the African continent  
102 lies in the fact that large ranges of arthropod vectors are capable of transmitting the virus. The  
103 presence of a wide range of hosts and vector species, and the epidemiological characteristics of RVF,  
104 had led to concerns that epidemics may occur in previously not described regions like Ethiopia [33]. In  
105 other East and central African countries such as Kenya, inter-epizootic/epidemic cases are increasingly  
106 documented for the past 10 years [34-37]. Ethiopia due to its geographic location as well as the vibrant  
107 livestock exchanges with neighboring countries makes it highly vulnerable to the disease particularly  
108 to cases that are not epidemic but occur on a more continued basis [38].

109 Somali region has the highest pastoralist communities in Ethiopia and yet, the status of the selected  
110 zoonotic diseases in humans and livestock are unknown. Thus, the aim of this study was to estimate  
111 the seroprevalence of brucellosis, Q-fever and RVF in humans and livestock and identify the associated  
112 risk factors in Adadle woreda. This study also aimed to highlight the awareness gap of the communities  
113 against zoonoses that could help shape future intervention strategies in preventing and controlling  
114 zoonotic diseases in the area.

## 115 **2. Materials and methods**

116 This study was part of research and development project called Jigjiga One Health Initiative (JOHI)  
117 funded by Swiss Agency for Cooperation and Development with major partnership between Jigjiga  
118 University, Swiss Tropical and Public Health Institute and Armauer Hansen Research Institute. The goal  
119 of the project was to improve the health and well-being of pastoralist communities in the Somali  
120 region of Ethiopia.

## 121 **2.1. Study area**

122 Adadle woreda (district) is situated in the Shabelle Zone of the Somali region of Ethiopia. It is located  
123 in the lowlands of the semi-arid Wabe Shabale River sub basin (Fig 1). The mean annual rainfall based  
124 on Gode (the main town of the zone) data is about 300 mm [39]. The main rainy season called “Gu”  
125 lasts from March to May and the short dry season known as “Xagaa” from June to August. The short  
126 rain “Dayr” between September and November and the long dry season “Jilaal” follow “Xagaa” from  
127 December to March. The woreda is composed of 15 kebeles (the smallest administrative units) [39]  
128 with a total population of 100,000 [40] (Fig 1). In 2000, the majority of people living in Adadle were  
129 pastoralists (60%), whereas 28% were agro-pastoralists and 10% practiced riverine cultivation as cited  
130 in [39].

## 131 **Fig 1. Map of the study area**

## 132 **2.2. Sample size calculation**

133 Sample size determination was conducted to estimate the precision of the study with an anticipated  
134 prevalence. In pastoral and settled livestock management systems in semi-arid areas of Africa, the  
135 seroprevalence of brucellosis in cattle is usually greater than 5%, ranging from 4.8-41.0% [41]. The  
136 seroprevalence of brucellosis is usually much lower in small ruminants than in cattle [41]. Considering  
137 that in the study area livestock has never been vaccinated against brucellosis, we assumed based on  
138 data from comparable countries that brucellosis had a prevalence of 7%, 5%, 12% and 7% in humans,  
139 camels, small ruminants and cattle, respectively. The design effect D was derived from the following  
140 formula  $D = 1 + (b-1) \rho$ ; where b is the number of units sampled per cluster and rho ( $\rho$ ) is the intra-  
141 cluster correlation coefficient [42]. A rho value for zoonoses (and infectious diseases more generally)  
142 is usually between 0.05-0.2 and rarely exceeds 0.3 with highly contagious viral infections [42, 43].  
143 Thus, a rho value of 0.15 was taken for initial sample size calculation. We calculated that a sample of  
144 180 humans from 60 clusters will lead to a standard error of 2.2% of our estimate. Sampling of three

145 hundred goats and three hundred sheep will lead to a standard error of 2.0% of our estimate for each  
146 species. Furthermore, sampling of 150 camels will lead to a standard error of 2.3% of our estimate.

### 147 **2.3. Sampling procedure**

148 Adadle woreda has 15 kebeles. Two kebeles were excluded from the study due to the lack of mobile  
149 phone network and poor accessibility. Six kebeles were selected randomly from the remaining  
150 thirteen kebeles with a selection probability proportional to the human population size. Melkasalah  
151 and Harsog were pure pastoralist kebeles, whereas Boholhagare, Bursaredo, Higlo and Gabal were  
152 agropastoralist. Even though Boholhagare and Higlo were listed as agropastoralist kebeles, people  
153 were mainly depended on livestock and practice crop plantation only during rainy seasons.

154 A village list was available for each agropastoral kebele. All villages in the kebele were assigned  
155 numbers. Community members (kebele administrators, elders and religious leaders) drew a minimum  
156 of 8 numbers from a bag to select the villages. In each selected village, households were selected by  
157 spinning a pen and proceeding in the direction of the pen head. All households in that direction were  
158 included. A village or camp was considered as a cluster in agropastoral or pastoral kebeles  
159 respectively. The two pastoralist kebeles were selected as follows: Kebele administrators reported  
160 which villages had concentrations of mobile pastoralist camps in the vicinity. We visited all reported  
161 villages and selected the camp (Reer) with the highest number of tents. We included all households  
162 of the selected Reer. Within the selected households, individuals who were present at the time of  
163 interview and were 16 years or older than were eligible to participate in the study.

#### 164 **2.3.1. Livestock**

165 The sampling was conducted between May and August, 2016 from six kebeles of Adadle woreda of  
166 Somali region, Ethiopia. The herd here is considered as a cluster. The animals within the herd of  
167 selected households were selected systematically using a sampling interval number (total number of  
168 animals in the herd which are  $\geq 6$  months divided by the number of animals to be sampled within the  
169 herd). The first animal was selected randomly, then every  $n^{\text{th}}$  animal until total sample size was  
170 attained. Camels were sampled outside the barn unlike other species but with the same methodology.

171 Within each herd, a maximum of nine from each livestock species were sampled. A total of 171  
172 camels, 297 goats, 269 sheep and 135 cattle were sampled from six kebeles.

### 173 **2.3.2. Humans**

174 Individual people within the selected households whose animals were sampled who were  $\geq 16$  years  
175 and who provided informed consent to participate the study were sampled. Semi-structured  
176 questionnaires were conducted to capture the risk factors associated with the zoonoses under study.  
177 Household was considered as a cluster. In addition to individuals within the selected households,  
178 people from the village who fulfilled the criteria (being  $\geq 16$  years, whose animals sampled and had  
179 willingness to participate the study) were voluntarily selected and sampled. A total of 190 humans  
180 were sampled from six kebeles. All the samples (n=190) were used for ELISA test but only 178 were  
181 used for brucellosis screening using RBPT.

### 182 **2.4. Questionnaire administration**

183 Households whose livestock and/people were sampled were questioned about livestock health and  
184 management as well as people demographic information and their risky practices. Some of the  
185 information was used to analyse the risk factors. The questionnaire was translated from English to  
186 Somali.

187

### 188 **2.5. Blood samples collection**

189 A nurse collected blood samples by venipuncture in 5 ml vacutainer tubes from humans and a  
190 veterinarian used 10 ml plain vacutainer tubes for livestock. The blood samples were labeled and kept  
191 at room temperature until clot formation. The blood samples were centrifuged at 3000 rpm for 5  
192 minutes. Sera were separated using pasteur pipettes and placed in a labeled 2 ml Eppendorf sera  
193 tubes. Sera samples were transported on ice to Gode city and stored at  $-20^{\circ}\text{C}$  until transported to  
194 Addis Ababa for laboratory testing at the Armauer Hansen Research Institute.



## 195 **2.6. Serological tests**

### 196 **2.6.1. Brucellosis serology**

197 Sera samples were first screened with the RBPT (ID. vet, Innovative Diagnostics, RSA-RB ver 0112 GB,  
198 Grabes, France). In livestock, all samples (n=872) were screened by RBPT but only 141 camels, 252  
199 goats, 229 sheep and 108 cattle (n=730) were then further tested by ELISA test. The reagents were  
200 left under room temperature for 30 minutes before testing. Equal volume of the reagent and serum  
201 (30µl) were placed on a clean plate. First, 30 µl of Rose Bengal was placed on the plate and 30 µl of  
202 serum was added then mixed thoroughly by using wooden applicator sticks and then the plate was  
203 shaken slowly with hand for about 4 minutes [44]. Any visible agglutination by naked eyes was  
204 considered as positive and lack of agglutination was considered as negative. Even if slight agglutination  
205 was observed, it was considered as a positive. Human sera which were positive in RBT (n=5) were  
206 sequentially diluted with phosphate buffered saline (PBS) to obtain dilutions from 1/4 and 1/8. All sera  
207 were found reactive in 1/4 dilutions and three sera were also reactive in 1/8 dilution.

208 All livestock samples positive with the RBPT(n=23) were further tested by indirect ELISA (CHEKIT  
209 Brucellose Serum ELISA Test Kit, IDEXX Laboratories, ME, USA) and classified as positive or negative  
210 according to the manufacturer's recommended cut-off ranges. Samples were tested in duplicates and  
211 the mean optical density (OD) value at 450nm of each was calculated  $[(S_{\text{sample}}/P_{\text{positive}}\% = \text{mean OD}$   
212  $\text{sample} - \text{mean OD negative control} / (\text{mean OD positive control} - \text{mean OD NC}) \times 100]$ . Brucellosis  
213 results were interpreted as positive (S/P ≥ 80%) and negative (S/P < 80%). Results were checked for  
214 validity according to the manufacturer's recommendations. In livestock, only iELISA positive samples  
215 were used for the data analysis, whereas in humans, RBPT positive samples were used for the data  
216 analysis.

### 217 **2.6.2. Q-fever and Rift Valley Fever serology**

218 All ruminants and camels samples were tested using indirect ELISA for Q-fever by using *Coxiella*  
219 *burnetii* phase I and II strain (ID-vet, Innovative Diagnostics, FQS-MS ver 0514 GB, Grabes, France). The  
220 Panbio *Coxiella burnetii* (Q-Fever) IgG ELISA was used for human sera (Panbio diagnostics, Cat. no.

221 06PE10, Germany). Q-fever results of livestock were classified as seropositive and seronegative by  
222 calculating the S/P% as described above. Q-fever results of livestock were interpreted as positive (S/P  
223 > 50%) and negative (S/P ≤ 40%). Q-fever results in humans were interpreted using an index value (IV)  
224 (IV= sample absorbance/cut-off value) as positive (IV > 1.1) and negative (IV < 0.9). All equivocal  
225 (doubtful) human Q-fever samples were re-tested. Results were checked for validity according to the  
226 manufacturer's recommendations.

227 Competitive ELISA (ID-vet, Innovative Diagnostics, RIFTC ver 1114 GB, Grabes, France) was used for  
228 Rift Valley Fever in both humans and livestock. RVF results were classified as seropositive and  
229 seronegative by calculating the mean OD value of each sample in both humans and livestock. Results  
230 were expressed as percentage ( $S_{\text{sample}}/N_{\text{egative}} \% = OD_{\text{sample}}/OD_{\text{NC}} \times 100$ ) and interpreted as positive  
231 (S/N ≤ 40%) and negative (S/N > 50%).

## 232 **2.7. Data analysis**

233 The data was entered into Microsoft Access then analyzed using STATA version 14 (Stata Corporation,  
234 College Station, TX, USA). Both descriptive and analytical statistics were used for data analysis. Logistic  
235 regression with clustering at household/herd level was used to estimate the apparent seroprevalence  
236 of humans and livestock. Uni and multivariable analysis was done to identify predictors for  
237 seropositivity. Age category, sex and kebele were included as categorical variables in the pre specified  
238 multivariable model. Age categories varies according to species. For sheep and goats (young= 1-2  
239 years, adult= 3-6 and old= >6). For cattle (young= 1-3 years, adult= 4-7 and old= >7). For camels  
240 (young= 1-4 years, adult= 5-8 and old= >8). For humans (young adult= 16-31 years, middle-aged adult=  
241 32-48 and old adult= ≥ 49). Generalized Estimating Equation (GEE) model for binomial outcomes were  
242 used to account for potential correlation within herds. For the correlation matrix in figure 3, we  
243 calculated the pairwise Pearson's correlation coefficient for the prevalence in two different species.

## 244 **2.8. Ethical clearance**

245 The study received ethical clearance from the “Ethikkommission Nordwest-und Zentralschweiz”  
246 (EKNZ) in Switzerland (BASEC UBE-req.2016-00204) and the Jigjiga University Research Ethics Review  
247 Committee (JJU-RERC002/2016).

## 248 **3. Results**

### 249 **3.1. Descriptive analysis of the study population**

250 About 77.4% (565/730) of the livestock were females and 22.6% (165/730) were males. About half of  
251 livestock sampled were adults; cattle (49.1%), camels (45.4%), goats (61.1%) and sheep (0%). In human  
252 samples, 48.9% (93/190) were females and 51.1% (97/190) were males with mean age of 42 years.  
253 The mentioned zoonotic diseases by the respondents included brucellosis, tuberculosis, and anthrax.  
254 The livestock vaccination status was based on all types of vaccines provided by the government except  
255 those against zoonotic diseases under the study (Table 1).

256 Table 1. Sampled household related information

| Variable                         | Category          | (% or mean $\pm$ SD <sup>a</sup> ) |
|----------------------------------|-------------------|------------------------------------|
| Family size                      | 1-6               | 25                                 |
|                                  | 7-10              | 54                                 |
|                                  | $\geq$ 11         | 21                                 |
| Production system                | Agropastoral      | 38                                 |
|                                  | Pastoral          | 62                                 |
| Livestock disease event prior to | Abortion          | 90                                 |
|                                  | Retained placenta | 38                                 |

|                                                     |                                             |         |
|-----------------------------------------------------|---------------------------------------------|---------|
| 6 months                                            | Weak newborns                               | 60      |
| Livestock vaccination status                        | Non-vaccinated                              | 41      |
|                                                     | Vaccinated                                  | 59      |
| Family herd size                                    | Cattle                                      | 2.0±1.2 |
|                                                     | Camel                                       | 1.6±1.1 |
|                                                     | Goat                                        | 3.5±1.0 |
|                                                     | Sheep                                       | 3.4±1.0 |
| Milk consumption habit                              | Raw                                         | 87      |
|                                                     | Boiled                                      | 13      |
| Zoonoses mentioned among all reported herd diseases | Mentioned at least one                      | 10      |
|                                                     | Mentioned as zoonoses but were not zoonoses | 17      |
|                                                     | I do not know                               | 73      |
| Marital status                                      | Married                                     | 99      |
|                                                     | Single                                      | 1       |
| Zoonoses awareness                                  | Yes                                         | 27      |
|                                                     | No                                          | 73      |

|                            |                    |     |
|----------------------------|--------------------|-----|
| Animal delivery assistance | Yes                | 100 |
|                            | No                 | 0   |
| Aborted fetus disposal     | Throw in the field | 100 |
|                            | Burn               | 0   |
|                            | Bury               | 0   |
|                            | Others             | 0   |

257 <sup>a</sup> SD= Standard deviation

258 **3.2. Apparent seroprevalence estimates of Q-fever, RVF and brucellosis in humans and**  
 259 **livestock in Adadle, Somali region of Ethiopia.**

260

261 The apparent seroprevalence of Q-fever in humans was 27.0% (95% CI 20.4-34.0) and RVF was 13.2%  
 262 (95% CI 8.7-18.8) (table 2). The apparent seroprevalence of Q-fever and RVF in livestock was 39.0%  
 263 (95% CI 35.1-42.3) and 15.2% (95% CI 12.7-18.0) respectively. The apparent seroprevalence of  
 264 brucellosis in humans was 2.8% (0.9-6.4) and 1.5% (0.2-5.2), 0.6% (0.0-3.2) in cattle and camels  
 265 respectively (table 2).

266 Table 2. Apparent seroprevalence of Q-fever, RVF and brucellosis in humans and livestock

| Zoonoses | Species | n-tested | n pos | Apparent (95% CI <sup>a</sup> ) |
|----------|---------|----------|-------|---------------------------------|
| Q-fever  | Human   | 188      | 50    | 26.3(20.2-33.4)                 |
|          | Cattle  | 108      | 11    | 9.6 (5.9-15.1)                  |
|          | Camel   | 141      | 79    | 55.7(46.0-65.0)                 |
|          | Goat    | 252      | 123   | 48.8(42.5-55.0)                 |

|             |        |     |    |                 |
|-------------|--------|-----|----|-----------------|
|             | Sheep  | 229 | 69 | 28.9(25.0-33.2) |
| RVF         | Human  | 190 | 25 | 13.2(8.7-19.4)  |
|             | Cattle | 108 | 19 | 17.9(11.0-27.8) |
|             | Camel  | 141 | 60 | 42.6(34.8-50.7) |
|             | Goat   | 252 | 15 | 6.3(3.3-11.6)   |
|             | Sheep  | 229 | 17 | 7.4(4.7-11.5)   |
| Brucellosis | Human  | 178 | 5  | 2.8(1.2-6.5)    |
|             | Cattle | 135 | 2  | 1.5 (0.4-5.6)   |
|             | Camel  | 171 | 1  | 0.6(0.1-4.0)    |
|             | Goat   | 297 | 0  | --              |
|             | Sheep  | 269 | 0  | --              |

267 <sup>a</sup> 95% CI are adjusted for clustering

268

269 In livestock, the highest seroprevalence of Q-fever was found in Harsog (50.0%, 95% CI 41.4-58.6) and  
 270 the least in Higlo (29.1%, 95% CI 17.6-42.9). In humans, the highest seroprevalence of Q-fever was  
 271 recorded in Boholhagare (42.0%, 95% CI 28.2-57.0) and the least in Gabal (5.9%, 95% CI 0.1-28.7). The  
 272 highest seroprevalence of RVF in livestock was found in Bursaredo (19.6%, 95% CI 13.7-26.7) and the  
 273 least in Melkasalah (9.8%, 95% CI 4.3-18.3). The highest seroprevalence of RVF in humans was 27.5%  
 274 (95% CI 15.9-41.7) and the least was 4.4% (95% CI 0.5-14.8) in Boholhagare and Harsog respectively  
 275 (Fig 2).

276 **Fig 2. The apparent seroprevalence of Q-fever (left) and RVF (right) in humans and livestock in**

277 **Adadle woreda, Somali region.** ☞ = humans and ☜ = livestock.

278 Camels had the highest seroprevalence of both Q-fever and RVF at herd level with 55.7% (95% CI 46.0-  
279 65.0) and 42.6% (95% CI 34.8-50.7) respectively. The lowest seroprevalence of Q-fever at herd level  
280 was found in cattle with 9.6% (95% CI 5.9-15.1) and RVF in goats with 6.3% (95% CI 3.3-11.6) (table 2).

### 281 **3.3. Apparent seroprevalence estimates of brucellosis in humans and livestock in Adadle,** 282 **Somali region of Ethiopia.**

283

284 The apparent seroprevalence of brucellosis in humans was 2.8% (0.9-6.4) and 0.3% (0.0-1.0) in  
285 livestock. Only cattle and camels were found seropositive for iELISA and all were females. The  
286 individual seroprevalence was 1.5% (95% CI 0.2-5.2) in cattle and 0.6% (95% CI 0.0-3.2) in camels.  
287 Seropositive cattle were from Boholhagare and Gabal kebeles whereas seropositive camels were only  
288 from Melkasalah kebele. No correlation was found between risk factors and brucellosis seropositivity  
289 in both humans and livestock. All seropositive samples were males in humans and females in livestock.  
290 Seropositivity of brucellosis was decreasing as age increased in humans but increased as age increased  
291 in cattle. The only positive sample for camel was in the age between five and eight years.

292

### 293 **3.4. Risk factors associated with human seropositivity of Q-fever and RVF**

294

295 In contrast to livestock, human seroprevalence was higher in males than females. Males had on  
296 average of 30% and 90% odds of seropositivity for Q-fever (OR= 1.3; 95% CI 0.6-2.5) and RVF (OR= 1.9;  
297 95% CI 0.7-4.8) than females respectively. Human seroprevalence increased with increasing age for  
298 RVF but not for Q-fever. In multivariable analysis, there were no significant association between any  
299 risk factor variables and seropositivity of Q-fever and RVF in humans next to kebele (table 3).

300 Table 3. Risk factors associated with human seropositivity for Q-fever and RVF

| Predictors | Category    | N tested | Q-fever                 | Odds ratio (95% CI)  |                        | N tested | RVF                     | Odds ratio (95% CI)  |                        |
|------------|-------------|----------|-------------------------|----------------------|------------------------|----------|-------------------------|----------------------|------------------------|
|            |             |          | Number (% seropositive) | Univariable analysis | Multivariable analysis |          | Number (% seropositive) | Univariable analysis | Multivariable analysis |
| Kebele     | Boholhagare | 50       | 21(42.0)                | 1                    | 1                      | 51       | 14(27.5)                | 1                    | 1                      |
|            | Gabal       | 17       | 1(5.9)                  | 0.1(0.0,0.7)         | 0.1(0.0,0.7)           | 17       | 2(12.0)                 | 0.4(0.1,1.7)         | 0.4(0.1,1.9)           |
|            | Harsog      | 46       | 11(24.0)                | 0.4(0.2,1.0)         | 0.5(0.2,1.2)           | 46       | 2(4.4)                  | 0.1(0.0,0.6)         | 0.1(0.0,0.7)           |
|            | Higlo       | 19       | 6(32.0)                 | 0.6(0.2,2.0)         | 0.7(0.2,2.1)           | 19       | 1(5.3)                  | 0.1(0.0,1.2)         | 0.2(0.0,1.3)           |
|            | Melkasalah  | 41       | 10(24.4)                | 0.4(0.2,1.1)         | 0.5(0.2,1.1)           | 42       | 3(7.1)                  | 0.2(0.1,0.8)         | 0.2(0.1,0.9)           |
|            | Bursaredo   | 15       | 1(6.7)                  | 0.1(0.0,0.8)         | 0.1(0.0,0.8)           | 15       | 3(20.0)                 | 0.7(0.2,2.7)         | 0.6(0.1,2.6)           |
| Sex        | Female      | 91       | 22(24.2)                | 1                    | 1                      | 93       | 8(9.0)                  | 1                    | 1                      |
|            | Male        | 97       | 28(28.9)                | 1.2(0.6,2.3)         | 1.3(0.6,2.5)           | 97       | 17(18.0)                | 2.2(0.9,5.4)         | 1.9(0.7,4.8)           |
| Age        | 16-31       | 68       | 17(25.0)                | 1                    | 1                      | 85       | 8(9.4)                  | 1                    | 1                      |
|            | 32-48       | 55       | 13(24.0)                | 1.0(0.4,2.1)         | 1.0(0.4,2.2)           | 40       | 5(13.0)                 | 1.2(0.4,4.0)         | 1.0(0.3,3.6)           |
|            | ≥49         | 65       | 20(31.0)                | 1.3(0.6,2.8)         | 1.3(0.6,3.1)           | 65       | 12(18.5)                | 1.9(0.7,4.8)         | 1.5(0.5,4.3)           |

301

### 302 3.5. Risk factors associated with livestock seropositivity for Q-fever and RVF

303

304 In livestock, high seroprevalence of both diseases were found in female animals than males and older  
305 age animals (except sheep). In sheep, all seropositive samples were older than six years. The cattle  
306 with age 4-7 years had higher odds of getting Q-fever infection than those less than 4 years (OR= 2.5;  
307 95% CI 0.2-29.6) but the confidence interval was broad and included unity. Camel seropositivity of Q-



308 fever and RVF were significantly associated with age (OR= 8.1; 95% CI 2.8-23.7 and OR=8.4; 95% CI  
 309 2.3-30.3) respectively (Table 4).

310 Table 4. Risk factors associated with livestock seropositivity for Q-fever and RVF

| Predictors | Category | N tested | Number (% seropositive) | Q-fever             |                        | RVF                     |                     |                        |
|------------|----------|----------|-------------------------|---------------------|------------------------|-------------------------|---------------------|------------------------|
|            |          |          |                         | Univariate analysis | Multivariable analysis | Number (% seropositive) | Univariate analysis | Multivariable analysis |
| Cattle     |          |          |                         | Odds ratio (95% CI) |                        | Odds ratio (95% CI)     |                     |                        |
| Sex        | Female   | 97       | 10(10.3)                | 1                   | 1                      | 19(20.0)                | ---                 |                        |
|            | Male     | 11       | 1(9.1)                  | 1.0(0.1,7.7)        | 2.4(0.1,47.2)          | 0(0.0)                  | ---                 |                        |
| Cattle     |          |          |                         |                     |                        |                         |                     |                        |
|            | 1-3      | 30       | 2(7.0)                  | 1                   | 1                      | 0(0.0)                  | ---                 | ---                    |
| Age        | 4-7      | 53       | 5(9.4)                  | 1.7(0.3,9.6)        | 2.5(0.2,29.6)          | 11(20.8)                | 0.6(0.2,1.8)        | 1.1(0.3,3.8)           |
|            | >7       | 25       | 4(16.0)                 | 3.0(0.5,18.0)       | 4.4(0.4,49.7)          | 8(32.0)                 |                     | ---                    |
| Camel      |          |          |                         |                     |                        |                         |                     |                        |
| Sex        | Female   | 119      | 75(63.0)                | 1                   | 1                      | 57(48.0)                | 1                   | 1                      |
|            | Male     | 22       | 4(18.2)                 | 0.1(0.0,0.4)        | 0.4(0.1,1.4)           | 3(14.0)                 | 0.2(0.0,0.6)        | 0.6(0.1,2.5)           |
| Camel      |          |          |                         |                     |                        |                         |                     |                        |
| Age        | 1-4      | 43       | 7(16.3)                 | 1                   | 1                      | 4(9.3)                  | 1                   | 1                      |

|       |        |     |           |                 |                |          |                  |                 |
|-------|--------|-----|-----------|-----------------|----------------|----------|------------------|-----------------|
|       | 5-8    | 64  | 43(67.2)  | 10.4(4.0,27.1)  | 8.1(2.8,23.7)  | 29(45.3) | 8.3(2.7,26.0)    | 8.4(2.3,30.3)   |
|       | >8     | 34  | 29(85.3)  | 29.6(8.5,103.1) | 24.0(6.1,92.4) | 27(79.4) | 39.7(10.6,149.4) | 34.0(8.0,145.5) |
| Goat  |        |     |           |                 |                |          |                  |                 |
| Sex   | Female | 181 | 100(55.3) | 1               | 1              | 14(8.0)  | 1                | 1               |
|       | Male   | 71  | 23(32.4)  | 0.4(0.2,0.7)    | 0.5(0.3,1.0)   | 1(1.4)   | 0.3(0.0,1.5)     | 0.3(0.0,2.6)    |
| Goat  |        |     |           |                 |                |          |                  |                 |
| Age   | 1-2    | 49  | 14(28.6)  | 1               | 1              | 2(4.1)   | 1                | 1               |
|       | 3-6    | 154 | 77(50.0)  | 2.5(1.2,5.0)    | 2.0(1.0,4.2)   | 3(2.0)   | 0.5(0.1,2.6)     | 0.3(0.0,2.0)    |
|       | >6     | 49  | 32(65.3)  | 4.8(2.0,11.2)   | 3.6(1.4,9.0)   | 10(20.4) | 5.5(1.2,24.2)    | 3.6(0.7,19.2)   |
| Sheep |        |     |           |                 |                |          |                  |                 |
| Sex   | Female | 168 | 52(31.0)  | 1               | 1              | 16(10.0) | 1                | 1               |
|       | Male   | 61  | 17(27.9)  | 1.0(0.5,1.7)    | 1.0(0.5,1.8)   | 1(1.6)   | 0.2(0.0,1.2)     | 0.2(0.0,1.5)    |
| Sheep |        |     |           |                 |                |          |                  |                 |
| Age   | 1-2    | 0   |           | ---             | ---            | 0        | ---              | ---             |
|       | 3-6    | 0   |           | ---             | ---            | 0        | ---              | ---             |
|       | >6     | 229 | 69(30.1)  | ---             |                | 17(7.4)  | ---              |                 |

311

312 **3.6. Correlation between human seropositivity and livestock seropositivity for Q-fever and**

313 **RVF**

314

315 Generally, there was only a weak correlation between human seropositivity and livestock seropositivity for  
316 both Q-fever and RVF. Human seropositivity of Q-fever was related with goats and RVF seropositivity was  
317 related with camels (Fig 3).

318 **Fig 3. Correlation between humans and livestock seropositivity for Q-fever and RVF. The upper number**  
319 **shows herd number and the lower number shows the Pearson's correlation coefficient.**

## 320 **4. Discussion**

321 The current findings established the seroprevalence of brucellosis, Q-fever and RVF in humans and  
322 livestock using for the first time a One Health study approach in the Somali region of Ethiopia. Mainly  
323 female animals were found in the sampled households, since pastoral communities keep animals  
324 mainly for reproduction and milk purposes. Agropastoral kebeles mostly kept small ruminants and  
325 cattle whereas in pastoral kebeles, they kept camels and small ruminants. Pastoralists had a nomadic  
326 way of life whereas agropastoralists were either transhumant or settled. Livestock abortions (90%)  
327 and weak newborns (60%) were commonly reported (Ibrahim et al., in press) and might cause negative  
328 consequences in production and economy for the households. According to our study, brucellosis was  
329 not the causative agent for abortion. There might be other infectious or non-infectious diseases causes  
330 that needs to be researched in the future. Camel abortion outbreak occurred in Somali region in 2016,  
331 and all samples tested found negative for brucellosis (Muhumed Ali, SORPARI staff; personal  
332 communication). Information about abortion incidences of pastoral livestock in Ethiopia that are  
333 vastly kept in the low lands are lacking. Abortion incidences in Ethiopia dairy cows in the highlands  
334 ranged from 2.2%- 28.9% [45].

335 This current finding of brucellosis seroprevalence was low. This was comparable with previous studies  
336 [11, 46] in camels and [11, 47-49] in cattle which reported from Somali and Oromia regions of Ethiopia.  
337 However, this study showed a lower prevalence than other previous studies in Ethiopia [12, 50, 51].  
338 This difference might be due to variation in location, husbandry and management system, breed and  
339 type of serological tests used [47, 52]. Most of the studies conducted in Ethiopia were used

340 complement fixation test as confirmatory diagnosis unlike the current study, which used iELISA. All  
341 small ruminants (n=11) which were seropositive in RBT were seronegative in iELISA. This might be that  
342 more false positives were captured by RBT but were seronegative using iELISA. Similarly [2, 20] found  
343 0% seroprevalence in small ruminants in Cote d'Ivoire and Togo. All seropositive were males in humans  
344 and females in livestock. Seropositivity of brucellosis in only female livestock shows their susceptibility  
345 for the infection and dominance within the herd [50]. The seropositivity of brucellosis had decreased  
346 as age increased in humans but increased as age increased in cattle. Higher seropositivity in older ages  
347 might be due to high risk of infection because of age and the multiple parities as they got older [53].

348 Q-fever studies in Ethiopia are rare and the few available studies focused on ticks. The present findings  
349 confirmed high Q-fever seroprevalence in humans and livestock. This is in agreement with the study  
350 [54]. Camels had the highest seroprevalence for both Q-fever and RVF. Highest Q-fever seropositivity  
351 in camels was in agreement with a study from Gumi et al., (2013) in southern pastoralist livestock of  
352 Ethiopia. The seroprevalence found in camels was lower than the above cited study, which might be  
353 due to differences in the study locations [55], however, was comparable to other studies [21, 56].  
354 Previous studies in Ethiopia showed that seroprevalence of brucellosis were lower in eastern than  
355 southern parts of the country which could hold true for Q-fever too [14, 57]. Relatively higher Q-fever  
356 seroprevalence in both humans and livestock were recorded in agropastoral than in pastoral kebeles.

357 Tick infestation was reported to be higher in agropastoral than pastoral kebeles (Ibrahim et al., in  
358 press). Ticks are naturally infected by *Coxiella burnetii* and transmit the *Coxiella* from infected animals  
359 during their blood meal to other healthy animals. We have observed that the communities used  
360 ineffective diazinone as acaricide indicating that ticks were regarded by enrolled communities as a  
361 livestock health problem (Ibrahim et al., in press). The diazinone was not effective either because it  
362 was available in the market informally through from Somalia where the quality was poor as compared  
363 to the ones imported formally into the country or pastoralists used it themselves with sometimes  
364 inappropriate dilution concentration.

365 In agropastoral kebeles, high wind movements were observed during the dry season (June-August).  
366 Human Q-fever infection are likely to occur where livestock seroprevalence is high and such winds are  
367 common facilitating the inhalation of dust contaminated with *Coxiella* that are spread massively by  
368 livestock during abortions due to Q-fever [58]. It was common in the area to assist animal delivery  
369 with bare hands and inappropriate management of aborted fetus, which could increase the exposure  
370 of the disease [59]. In our study, human Q-fever seropositivity was weakly correlated with goats. This  
371 is in contrast to previous studies [23, 55, 60], but in line with recent outbreaks in Canada, Australia  
372 and Netherlands [18, 61, 62].

373 Seroprevalence of Q-fever in female camels were three times higher than males. The same pattern  
374 was observed among other livestock species. Similar findings were found in various studies in the  
375 Sahel [56, 63]. This might be due to high susceptibility of the bacteria to udder, placenta and amniotic  
376 fluids. Seroprevalence of Q-fever in camels was statistically significant associated with age ( $p < 0.001$ ).  
377 This was comparable with the study of [63]. Another studies showed that, like in our study- increasing  
378 age increased the seroprevalence of Q-fever in all livestock species [64-66] which is not surprising  
379 given the cumulative time of potential exposure. Unlike livestock, men had twice higher  
380 seroprevalence for Q-fever than women. This might be that, males took livestock to the market and  
381 are exposed to contaminated dusts (Ibrahim et al., in press).

382 There has been recently an increasing evidence and documentation of RVF inter-epidemic cases in  
383 East and central Africa [34-37]. To our knowledge, this study is the first to report RVF seropositivity in  
384 humans and livestock in Ethiopia. Different models predicted the suitability of RVF occurrence in  
385 Ethiopia due to climate change, vector distribution and livestock exchanges with neighboring  
386 countries with history of RVF outbreaks [33, 38]. This study showed high seroprevalence of RVF in both  
387 humans and livestock, which lay within the ranges of reported seroprevalences in other East African  
388 countries [26]. For livestock, relatively high seroprevalences of RVF were found in agropastoral kebeles  
389 for camels and cattle, but these were not significantly different to those of small ruminants. High

390 human seroprevalence of RVF was found in our study in agropastoral kebeles. This could be due to  
391 the abundance of vectors in those kebeles closer to the river (1-18 km) and main livestock species  
392 (sheep and goats) susceptibility for RVF-virus. Flooding of the Wabi-Shabele river is common in these  
393 agropastoral kebeles of Adadle woreda which might increase the suitability of amplification and  
394 transmission of RVF-Virus similar to the report by [67] in Madagascar. In contrast to our study, Sumaye  
395 et al., (2013) reported high seroprevalence the further away from flooding area in Tanzania.

396 Agropastoral kebeles were relatively nearer than pastoral kebeles to the largest livestock market  
397 (Gode) in the area. At Gode market, animals from different areas including neighboring Somalia are  
398 traded. Hence, high livestock movements for trade might increase RVFV exposure [35]. RVF  
399 seropositivity was associated with livestock species. Among all livestock species, seroprevalence of  
400 RVF was statistically significant with increasing age only in camels. Traditionally in pastoral  
401 communities, camels were rarely sold especially females compared to other livestock species. This  
402 might increase the exposure of RVFV in female camels as they stay long in the herd. Indeed, it also  
403 shows RVFV exposure in the area since a longer period. What seems important to highlight is the fact  
404 that in small ruminants and camels we found seropositivity also in the youngest class, which suggests  
405 ongoing (inter-epidemic) transmission. The risk of human exposure during inter-epidemic livestock  
406 infection is not yet well documented. However, one can state that an endemic situation on livestock  
407 most likely leads to endemic infection pressure in people. Unlike livestock, men had twice higher  
408 seroprevalence for RVF than women. This was similar with the study of [68]. Human seropositivity for  
409 RVF increased with age. This might be the potential risk of older people to be exposed to infected  
410 materials and vector for RVFV as in Kenya [37] or the longer you live, the higher chance to get once in  
411 your life exposure to the agent.

412 Assessing human and livestock zoonoses seroprevalence simultaneously allowed the identification of  
413 the most important animal sources. In this way, an added value of an integrated human and animal  
414 health approach is demonstrated. More researches is needed to use this data in view of using it to

415 plan cost-effective intervention programs-and then to compare to other human and animal health  
416 priorities.

## 417 **Conclusions**

418 This study revealed the exposure to brucellosis, Q-fever, and RVF in humans and livestock in Adadle  
419 worda. Our results indicated that there are several zoonotic infections in the area without clinical  
420 signs or outbreaks. The medical personnel should consider such zoonoses more carefully because  
421 most cases were either misreported or ignored at all in the daily routine diagnosis at health facilities.  
422 Hence, continuous sero-surveillance in both humans and livestock is necessary. Further researches to  
423 look more in depth into negotiating health priorities and intervention strategies in face of other  
424 prevailing health problems in people and livestock is needed. A One Health study approach as used  
425 here allowed to detect most important sources for people of three zoonotic diseases and provided  
426 evidence of needed future negotiations on potential actions in surveillance and interventions.

427

428

## 429 **5. Acknowledgments**

430

431 We would like to thank the Swiss Agency for Development and Cooperation (SDC) for funding this  
432 study. This study would not have been possible without the support of Adadle communities especially,  
433 worda administrators, human and animal health bureaus, zonal administrators and  
434 pastoral/agropastoral communities. We would like to thank the Armauer Hansen Research Institute  
435 (AHRI) for the support with the lab analysis, particularly Robel Gesese, Azeb Tarekegn, Ashenafi  
436 G/giorgis, Ashenafi Alemu, Mahlet Usman, Marechign Yimer, Metasebiya Tegegn, Melaku Tilahun and  
437 Biruk Yeshitela. Lastly, we would like to thank Jigjiga University and the JOHI team for their  
438 collaboration and support.

## 439 **6. References**

- 440 1. World Bank. People, Pathogens and our Planet. The Economics of One Health. 2012. Report  
441 No.: 69145-GLB.
- 442 2. Kanoute YB, Gragnon BG, Schindler C, Bonfoh B, Schelling E. Reprint of "Epidemiology of  
443 brucellosis, Q Fever and Rift Valley Fever at the human and livestock interface in northern Cote  
444 d'Ivoire". *Acta Trop*. 2017;175:121-9.
- 445 3. Zinsstag J, Schelling E, Waltner-Toews D, Whittaker M, Tanner M. One Health: the theory and  
446 practice of integrated health approaches: CABI; 2015.
- 447 4. Grace D, Mutua F, Ochungo P, Kruska R, Jones K, Brierley L, et al. Mapping of poverty and likely  
448 zoonoses hotspots. 2012.
- 449 5. Pieracci EG, Hall AJ, Gharpure R, Haile A, Walelign E, Deressa A, et al. Prioritizing zoonotic  
450 diseases in Ethiopia using a one health approach. *One Health*. 2016;2:131-5.
- 451 6. McDermott John, Grace Delia, Zinsstag J. Economics of brucellosis impact and control in low-  
452 income countries. 2013;32(1):249-61.
- 453 7. Ducrotoy MJ, Ammary K, Ait Lbacha H, Zouagui Z, Mick V, Prevost L, et al. Narrative overview  
454 of animal and human brucellosis in Morocco: intensification of livestock production as a driver for  
455 emergence? *Infect Dis Poverty*. 2015;4:57.
- 456 8. Al Shehhi N, Aziz F, Al Hosani F, Aden B, Blair I. Human brucellosis in the Emirate of Abu Dhabi,  
457 United Arab Emirates, 2010-2015. *BMC Infect Dis*. 2016;16(1):558.
- 458 9. Sharma HK, Kotwal SK, Singh DK, Malik MA, Kumar A, Rajagunalan, et al. Seroprevalence of  
459 human brucellosis in and around Jammu, India, using different serological tests. *Vet World*.  
460 2016;9(7):742-6.
- 461 10. Garcell HG, Garcia EG, Pueyo PV, Martin IR, Arias AV, Alfonso Serrano RN. Outbreaks of  
462 brucellosis related to the consumption of unpasteurized camel milk. *J Infect Public Health*.  
463 2016;9(4):523-7.



- 464 11. Gumi B, Firdessa R, Yamuah L, Sori T, Tolosa T, Aseffa A, et al. Seroprevalence of Brucellosis  
465 and Q-Fever in Southeast Ethiopian Pastoral Livestock. *J Vet Sci Med Diagn*. 2013;2(1).
- 466 12. Tilahun B, Bekana M, Belihu K, Zewdu EJJVM, Health A. Camel brucellosis and management  
467 practices in Jijiga and Babile districts, Eastern Ethiopia. 2013;5(3):81-6.
- 468 13. Haileselassie M, Kalayou S, Kyule M, Asfaha M, Belihu K. Effect of Brucella infection on  
469 reproduction conditions of female breeding cattle and its public health significance in Western tigray,  
470 northern ethiopia. *Vet Med Int*. 2011;2011:354943.
- 471 14. Yilma M, Mamo G, Mammo B. Review on Brucellosis Sero-prevalence and Ecology in Livestock  
472 and Human Population of Ethiopia. *Achievements in the Life Sciences*. 2016;10(1):80-6.
- 473 15. Yeshwas F, Desalegne M, Gebreyesus M, Mussie HMJEVJ. Study on the seroprevalence of small  
474 ruminant brucellosis in and around Bahir Dar, north west Ethiopia. 2011;15(2):35-44.
- 475 16. Aduugna K, Agga G, Zewde GJRST. Seroepidemiological survey of bovine brucellosis in cattle  
476 under a traditional production system in western Ethiopia. 2013;32(3):765-73.
- 477 17. Zerfu B, Medhin G, Mamo G, Getahun G, Tschopp R, Legesse M. Community-based prevalence  
478 of typhoid fever, typhus, brucellosis and malaria among symptomatic individuals in Afar Region,  
479 Ethiopia. *PLoS Negl Trop Dis*. 2018;12(10):e0006749.
- 480 18. Bond KA, Vincent G, Wilks CR, Franklin L, Sutton B, Stenos J, et al. One Health approach to  
481 controlling a Q fever outbreak on an Australian goat farm. *Epidemiol Infect*. 2016;144(6):1129-41.
- 482 19. Brandwagt DA, Herremans T, Schneeberger PM, Hackert VH, Hoebe CJ, Paget J, et al. Waning  
483 population immunity prior to a large Q fever epidemic in the south of The Netherlands. *Epidemiol  
484 Infect*. 2016;144(13):2866-72.
- 485 20. Dean AS, Bonfoh B, Kulo AE, Boukaya GA, Amidou M, Hattendorf J, et al. Epidemiology of  
486 brucellosis and q Fever in linked human and animal populations in northern togo. *PLoS One*.  
487 2013;8(8):e71501.

- 488 21. Wardrop NA, Thomas LF, Cook EA, de Glanville WA, Atkinson PM, Wamae CN, et al. The Sero-  
489 epidemiology of *Coxiella burnetii* in Humans and Cattle, Western Kenya: Evidence from a Cross-  
490 Sectional Study. *PLoS Negl Trop Dis*. 2016;10(10):e0005032.
- 491 22. Nahed HG, Khaled AJJAS. Seroprevalence of *Coxiella burnetii* antibodies among farm animals  
492 and human contacts in Egypt. 2012;8:619-21.
- 493 23. Schelling E, Diguimbaye C, Daoud S, Nicolet J, Boerlin P, Tanner M, et al. Brucellosis and Q-  
494 fever seroprevalences of nomadic pastoralists and their livestock in Chad. *Prev Vet Med*.  
495 2003;61(4):279-93.
- 496 24. Abebe A. Prevalence of Q fever infection in the Addis Ababa abattoir. *Ethiopian medical*  
497 *journal*. 1990;28(3):119-22.
- 498 25. OIE. World Organisation for Animal Health 2016 [Available from:  
499 [https://www.oie.int/fileadmin/Home/eng/Animal\\_Health\\_in\\_the\\_World/docs/pdf/Disease\\_cards/RI](https://www.oie.int/fileadmin/Home/eng/Animal_Health_in_the_World/docs/pdf/Disease_cards/RI)  
500 [FT\\_VALLEY\\_FEVER.pdf](https://www.oie.int/fileadmin/Home/eng/Animal_Health_in_the_World/docs/pdf/Disease_cards/RI_FT_VALLEY_FEVER.pdf).
- 501 26. Clark MHA, Warimwe GM, Di Nardo A, Lyons NA, Gubbins S. Systematic literature review of  
502 Rift Valley fever virus seroprevalence in livestock, wildlife and humans in Africa from 1968 to 2016.  
503 *PLoS Negl Trop Dis*. 2018;12(7):e0006627.
- 504 27. Nakoune E, Kamgang B, Berthet N, Manirakiza A, Kazanji M. Rift Valley Fever Virus Circulating  
505 among Ruminants, Mosquitoes and Humans in the Central African Republic. *PLoS Negl Trop Dis*.  
506 2016;10(10):e0005082.
- 507 28. Ng'ang'a CM, Bukachi SA, Bett BK. Lay perceptions of risk factors for Rift Valley fever in a  
508 pastoral community in northeastern Kenya. *BMC Public Health*. 2016;16:32.
- 509 29. Cook EAJ, Grossi-Soyster EN, de Glanville WA, Thomas LF, Kariuki S, Bronsvort BMC, et al. The  
510 sero-epidemiology of Rift Valley fever in people in the Lake Victoria Basin of western Kenya. *PLoS Negl*  
511 *Trop Dis*. 2017;11(7):e0005731.

- 512 30. Abakar MF, Nare NB, Schelling E, Hattendorf J, Alfaroukh IO, Zinsstag J. Seroprevalence of Rift  
513 Valley fever, Q fever, and brucellosis in ruminants on the southeastern shore of Lake Chad. *Vector*  
514 *Borne Zoonotic Dis.* 2014;14(10):757-62.
- 515 31. Matiko MK, Salekwa LP, Kasanga CJ, Kimera SI, Evander M, Nyangi WP. Serological evidence  
516 of inter-epizootic/inter-epidemic circulation of Rift Valley fever virus in domestic cattle in Kyela and  
517 Morogoro, Tanzania. *PLoS Negl Trop Dis.* 2018;12(11):e0006931.
- 518 32. Di Nardo A, Rossi D, Saleh SM, Lejlifa SM, Hamdi SJ, Di Gennaro A, et al. Evidence of Rift Valley  
519 fever seroprevalence in the Sahrawi semi-nomadic pastoralist system, Western Sahara. *BMC Vet Res.*  
520 2014;10:92.
- 521 33. Tran A, Trevennec C, Lutwama J, Sserugga J, Gely M, Pittiglio C, et al. Development and  
522 Assessment of a Geographic Knowledge-Based Model for Mapping Suitable Areas for Rift Valley Fever  
523 Transmission in Eastern Africa. *PLoS Negl Trop Dis.* 2016;10(9):e0004999.
- 524 34. Halawi AD, Saasa N, Pongombo BL, Kajihara M, Chambaro HM, Hity M, et al. Seroprevalence  
525 of Rift Valley fever in cattle of smallholder farmers in Kwilu Province in the Democratic Republic of  
526 Congo. *Trop Anim Health Prod.* 2019;51(8):2619-27.
- 527 35. Sumaye RD, Geubbels E, Mbeyela E, Berkvens D. Inter-epidemic transmission of Rift Valley  
528 fever in livestock in the Kilombero River Valley, Tanzania: a cross-sectional survey. *PLoS Negl Trop Dis.*  
529 2013;7(8):e2356.
- 530 36. Britch SC, Binopal YS, Ruder MG, Kariithi HM, Linthicum KJ, Anyamba A, et al. Rift Valley fever  
531 risk map model and seroprevalence in selected wild ungulates and camels from Kenya. *PLoS One.*  
532 2013;8(6):e66626.
- 533 37. LaBeaud AD, Pfeil S, Muiruri S, Dahir S, Sutherland LJ, Traylor Z, et al. Factors associated with  
534 severe human Rift Valley fever in Sangailu, Garissa County, Kenya. *PLoS Negl Trop Dis.*  
535 2015;9(3):e0003548.
- 536 38. Anyamba A, Chretien J-P, Small J, Tucker CJ, Formenty PB, Richardson JH, et al. Prediction of a  
537 Rift Valley fever outbreak. 2009;106(3):955-9.

- 538 39. Gebre-Mariam A. The Critical Issue of Land Ownership. Violent Conflict between the Abdalla  
539 Tolo-mogge and the Awlihan in Godey Zone, Somali Region, Ethiopia: NCCR North-South Dialogue;  
540 2007.
- 541 40. SRBoFED. Somali Region Bureau of Finance Economic and Development Data Collection  
542 Created In ArcGIS 9.3 Using ArcMap. 2014.
- 543 41. McDermott JJ, Arimi SJVm. Brucellosis in sub-Saharan Africa: epidemiology, control and  
544 impact. 2002;90(1-4):111-34.
- 545 42. Bennett S, Woods T, Liyanage WM, Smith DL. A simplified general method for cluster-sample  
546 surveys of health in developing countries. 1991.
- 547 43. Otte M, Gumm IJPVM. Intra-cluster correlation coefficients of 20 infections calculated from  
548 the results of cluster-sample surveys. 1997;31(1-2):147-50.
- 549 44. OIE. World Organisation for Animal Health. OIE Terrestrial Manual 2018 [Available from:  
550 [https://www.oie.int/fileadmin/Home/eng/Health\\_standards/tahm/3.01.04\\_BRUCELLOSIS.pdf](https://www.oie.int/fileadmin/Home/eng/Health_standards/tahm/3.01.04_BRUCELLOSIS.pdf).
- 551 45. Tulu D, Deresa B, Begna F, Gojam AJJoVM, Health A. Review of common causes of abortion in  
552 dairy cattle in Ethiopia. 2018;10(1):1-13.
- 553 46. Gessese A, Mulate B, Nazir S, Asmare AJJVSM. Seroprevalence of brucellosis in camels  
554 (Camelus dromedaries) in South East Ethiopia. 2014;1:2.
- 555 47. Terefe Y, Girma S, Mekonnen N, Asrade B. Brucellosis and associated risk factors in dairy cattle  
556 of eastern Ethiopia. Trop Anim Health Prod. 2017;49(3):599-606.
- 557 48. Dirar BG, Nasinyama GW, Gelalcha BD. Seroprevalence and risk factors for brucellosis in cattle  
558 in selected districts of Jimma zone, Ethiopia. Trop Anim Health Prod. 2015;47(8):1615-9.
- 559 49. Degefu H, Mohamud M, Hailemelekot M, Yohannes MJEVJ. Seroprevalence of bovine  
560 brucellosis in agro pastoral areas of Jijjiga zone of Somali National Regional State, Eastern Ethiopia.  
561 2011;15(1).
- 562 50. Zewdie W. Review on Bovine, Small ruminant and Human Brucellosis in Ethiopia. J Vet Med  
563 Res 5(9): 1157. 2018.

- 564 51. Bekele WA, Tessema TS, Melaku SKJ. Avs. *Camelus dromedarius* brucellosis and its public health  
565 associated risks in the Afar National Regional State in northeastern Ethiopia. 2013;55(1):89.
- 566 52. Racloz V, Schelling E, Chitnis N, Roth F, Zinsstag JJORSeT. Persistence of brucellosis in pastoral  
567 systems. 2013;32(1):61-70.
- 568 53. ElTahir Y, Al Toobi AG, Al-Marzooqi W, Mahgoub O, Jay M, Corde Y, et al. Serological, cultural  
569 and molecular evidence of *Brucella melitensis* infection in goats in Al Jabal Al Akhdar, Sultanate of  
570 Oman. *Vet Med Sci*. 2018.
- 571 54. Jarelnabi AA, Alshaikh MA, Bakhiet AO, Omer SA, Aljumaah RS, Harkiss GD, et al.  
572 Seroprevalence of Q fever in farm animals in Saudi Arabia. 2018;29:895-900.
- 573 55. Vanderburg S, Rubach MP, Halliday JE, Cleaveland S, Reddy EA, Crump JA. Epidemiology of  
574 *Coxiella burnetii* infection in Africa: a OneHealth systematic review. *PLoS Negl Trop Dis*.  
575 2014;8(4):e2787.
- 576 56. Hussein MF, Alshaikh MA, Al-Jumaah RS, Garelnabi A, Al-Khalifa I, Mohammed OB. The  
577 Arabian camel (*Camelus dromedarius*) as a major reservoir of Q fever in Saudi Arabia. *Comparative*  
578 *Clinical Pathology*. 2014;24(4):887-92.
- 579 57. Asmare A. Seroprevalence of Brucellosis in Camels (*Camelus dromedaries*) in South East  
580 Ethiopia. *Journal of Veterinary Science & Medical Diagnosis*. 2014;03(01).
- 581 58. Kersh GJ, Wolfe TM, Fitzpatrick KA, Candee AJ, Oliver LD, Patterson NE, et al. Presence of  
582 *Coxiella burnetii* DNA in the environment of the United States, 2006 to 2008. *Appl Environ Microbiol*.  
583 2010;76(13):4469-75.
- 584 59. Tschopp R, Abera B, Sourou SY, Guerne-Bleich E, Aseffa A, Wubete A, et al. Bovine tuberculosis  
585 and brucellosis prevalence in cattle from selected milk cooperatives in Arsi zone, Oromia region,  
586 Ethiopia. 2013;9(1):163.
- 587 60. Abdullah H, El-Shanawany EE, Abdel-Shafy S, Abou-Zeina HAA, Abdel-Rahman EH. Molecular  
588 and immunological characterization of *Hyalomma dromedarii* and *Hyalomma excavatum* (Acari:  
589 Ixodidae) vectors of Q fever in camels. *Vet World*. 2018;11(8):1109-19.

- 590 61. Meadows S, Jones-Bitton A, McEwen SA, Jansen J, Patel SN, Filejski C, et al. Coxiella burnetii  
591 (Q Fever) Seropositivity and Associated Risk Factors in Sheep and Goat Farm Workers in Ontario,  
592 Canada. Vector Borne Zoonotic Dis. 2016;16(10):643-9.
- 593 62. Enserink M. Questions abound in Q-fever explosion in the Netherlands. American Association  
594 for the Advancement of Science; 2010.
- 595 63. Benaissa MH, Ansel S, Mohamed-Cherif A, Benfodil K, Khelef D, Youngs CR, et al.  
596 Seroprevalence and risk factors for *Coxiella burnetii*, the causative agent of Q fever in the  
597 dromedary camel (*Camelus dromedarius*) population in Algeria. Onderstepoort J Vet Res.  
598 2017;84(1):e1-e7.
- 599 64. Klemmer J, Njeru J, Emam A, El-Sayed A, Moawad AA, Henning K, et al. Q fever in Egypt:  
600 Epidemiological survey of Coxiella burnetii specific antibodies in cattle, buffaloes, sheep, goats and  
601 camels. PLoS One. 2018;13(2):e0192188.
- 602 65. Browne AS, Fevre EM, Kinnaird M, Muloi DM, Wang CA, Larsen PS, et al. Serosurvey of Coxiella  
603 burnetii (Q fever) in Dromedary Camels (*Camelus dromedarius*) in Laikipia County, Kenya. Zoonoses  
604 Public Health. 2017;64(7):543-9.
- 605 66. Klaasen M, Roest HJ, van der Hoek W, Goossens B, Secka A, Stegeman A. Coxiella burnetii  
606 seroprevalence in small ruminants in The Gambia. PLoS One. 2014;9(1):e85424.
- 607 67. Chevalier V, Pépin M, Plee L, Lancelot RJES. Rift Valley fever-a threat for Europe?  
608 2010;15(10):18-28.
- 609 68. Olive MM, Chevalier V, Grosbois V, Tran A, Andriamandimby SF, Durand B, et al. Integrated  
610 Analysis of Environment, Cattle and Human Serological Data: Risks and Mechanisms of Transmission  
611 of Rift Valley Fever in Madagascar. PLoS Negl Trop Dis. 2016;10(7):e0004827.

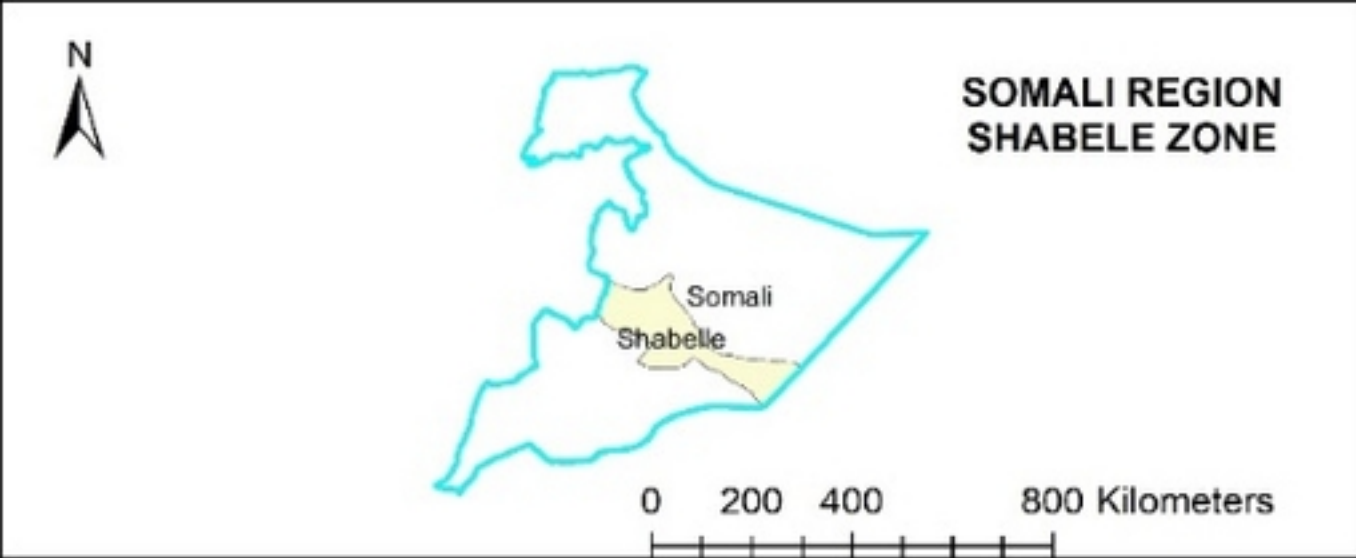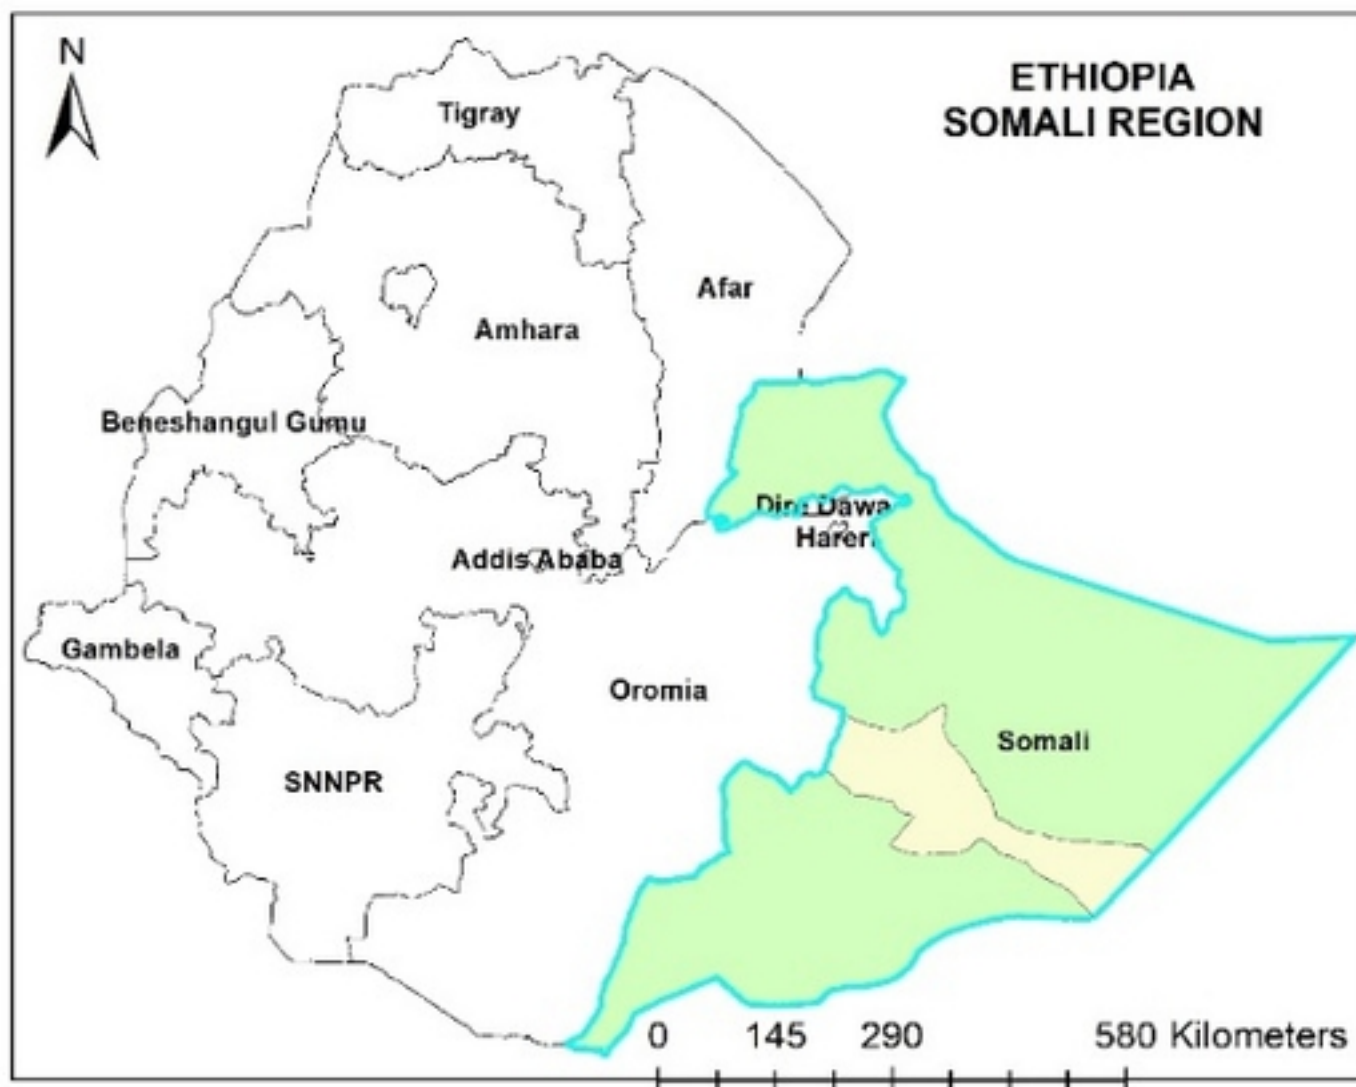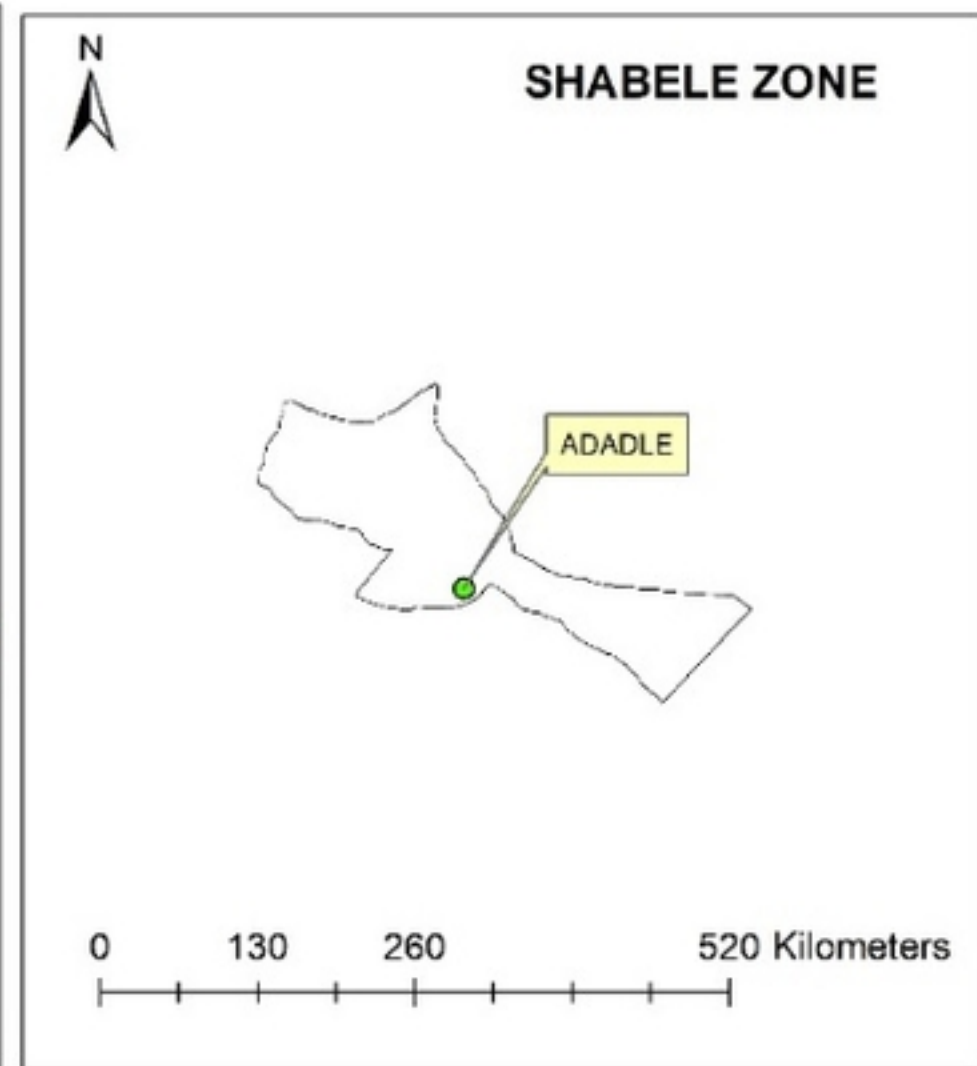

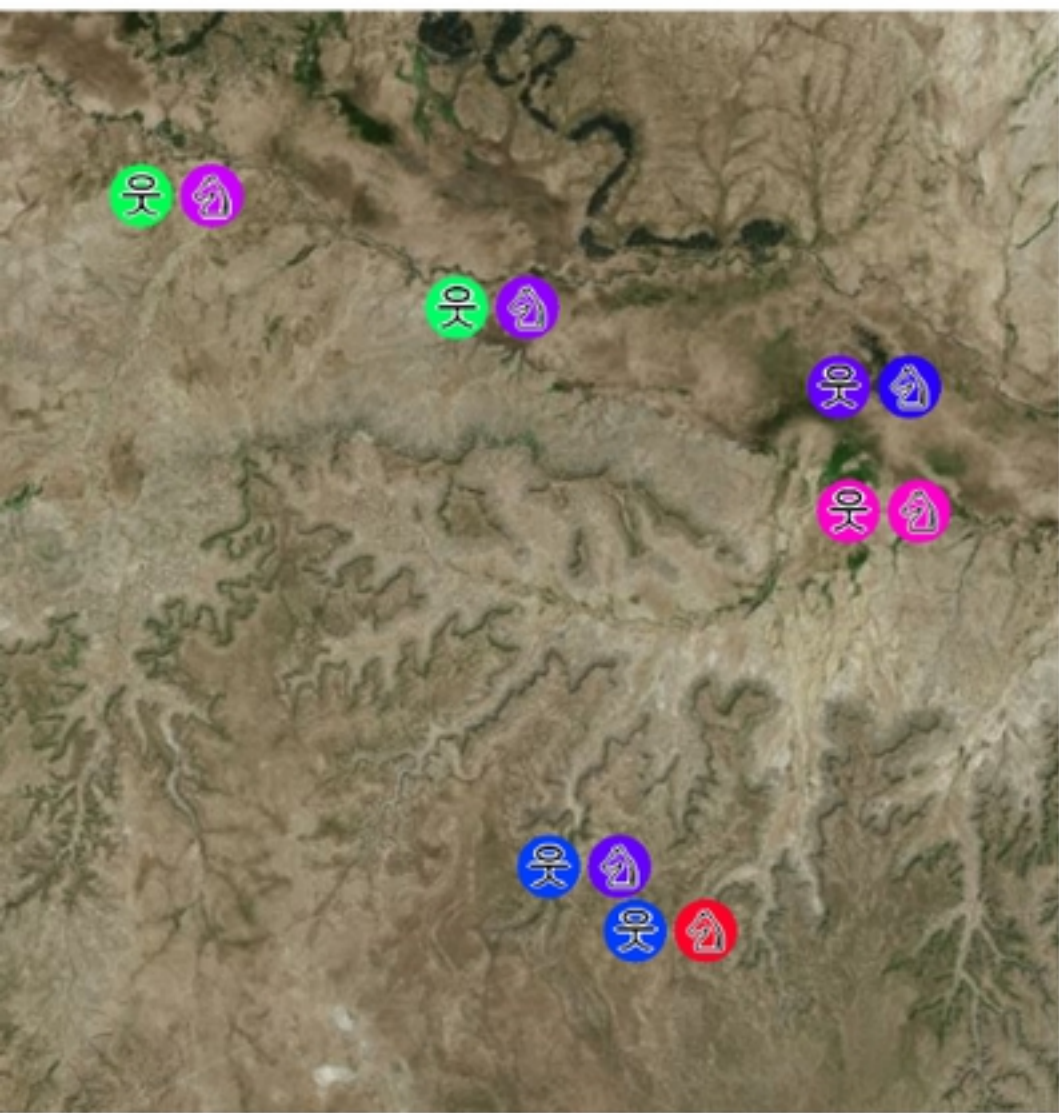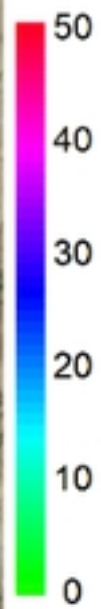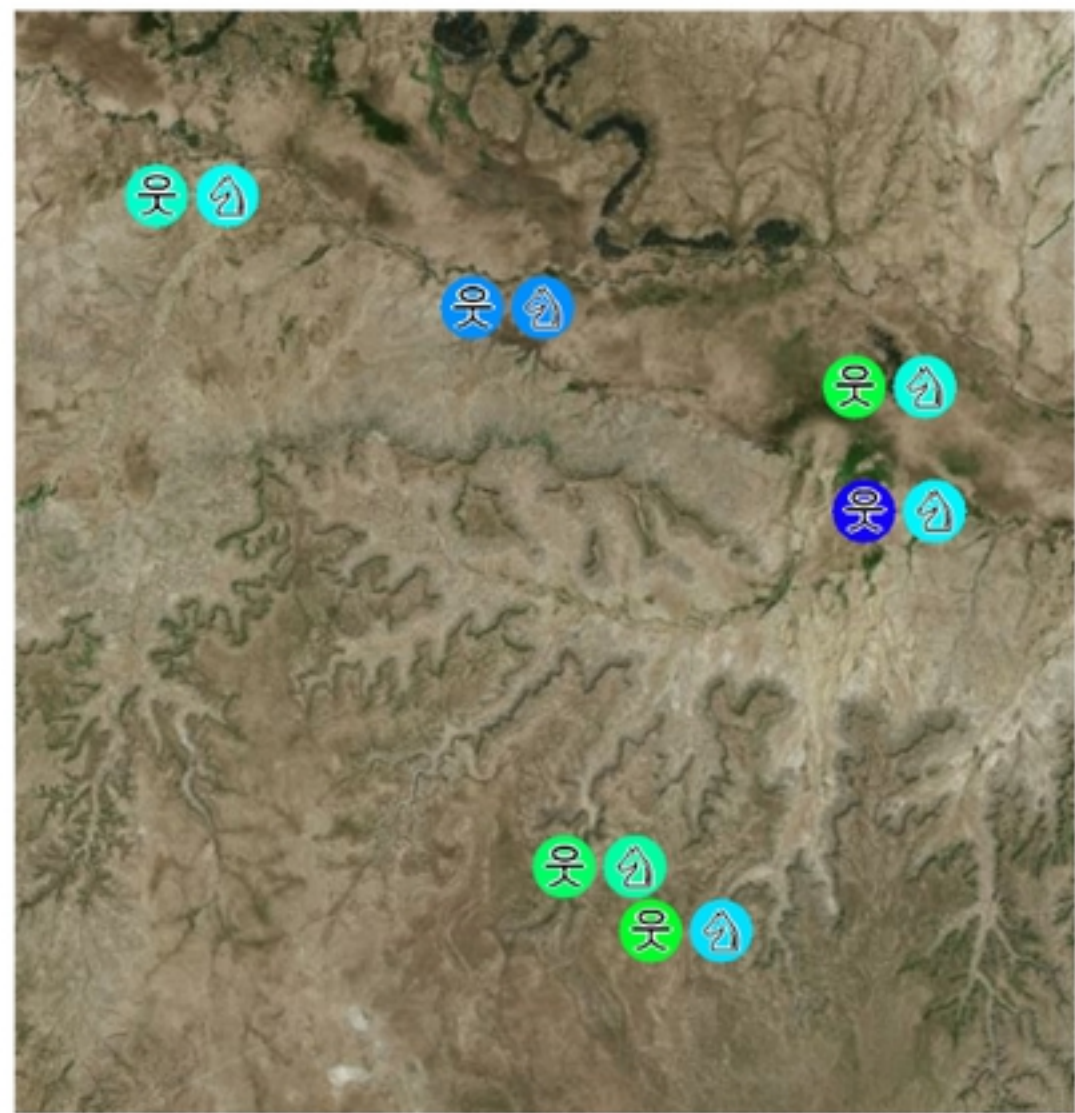

Figure



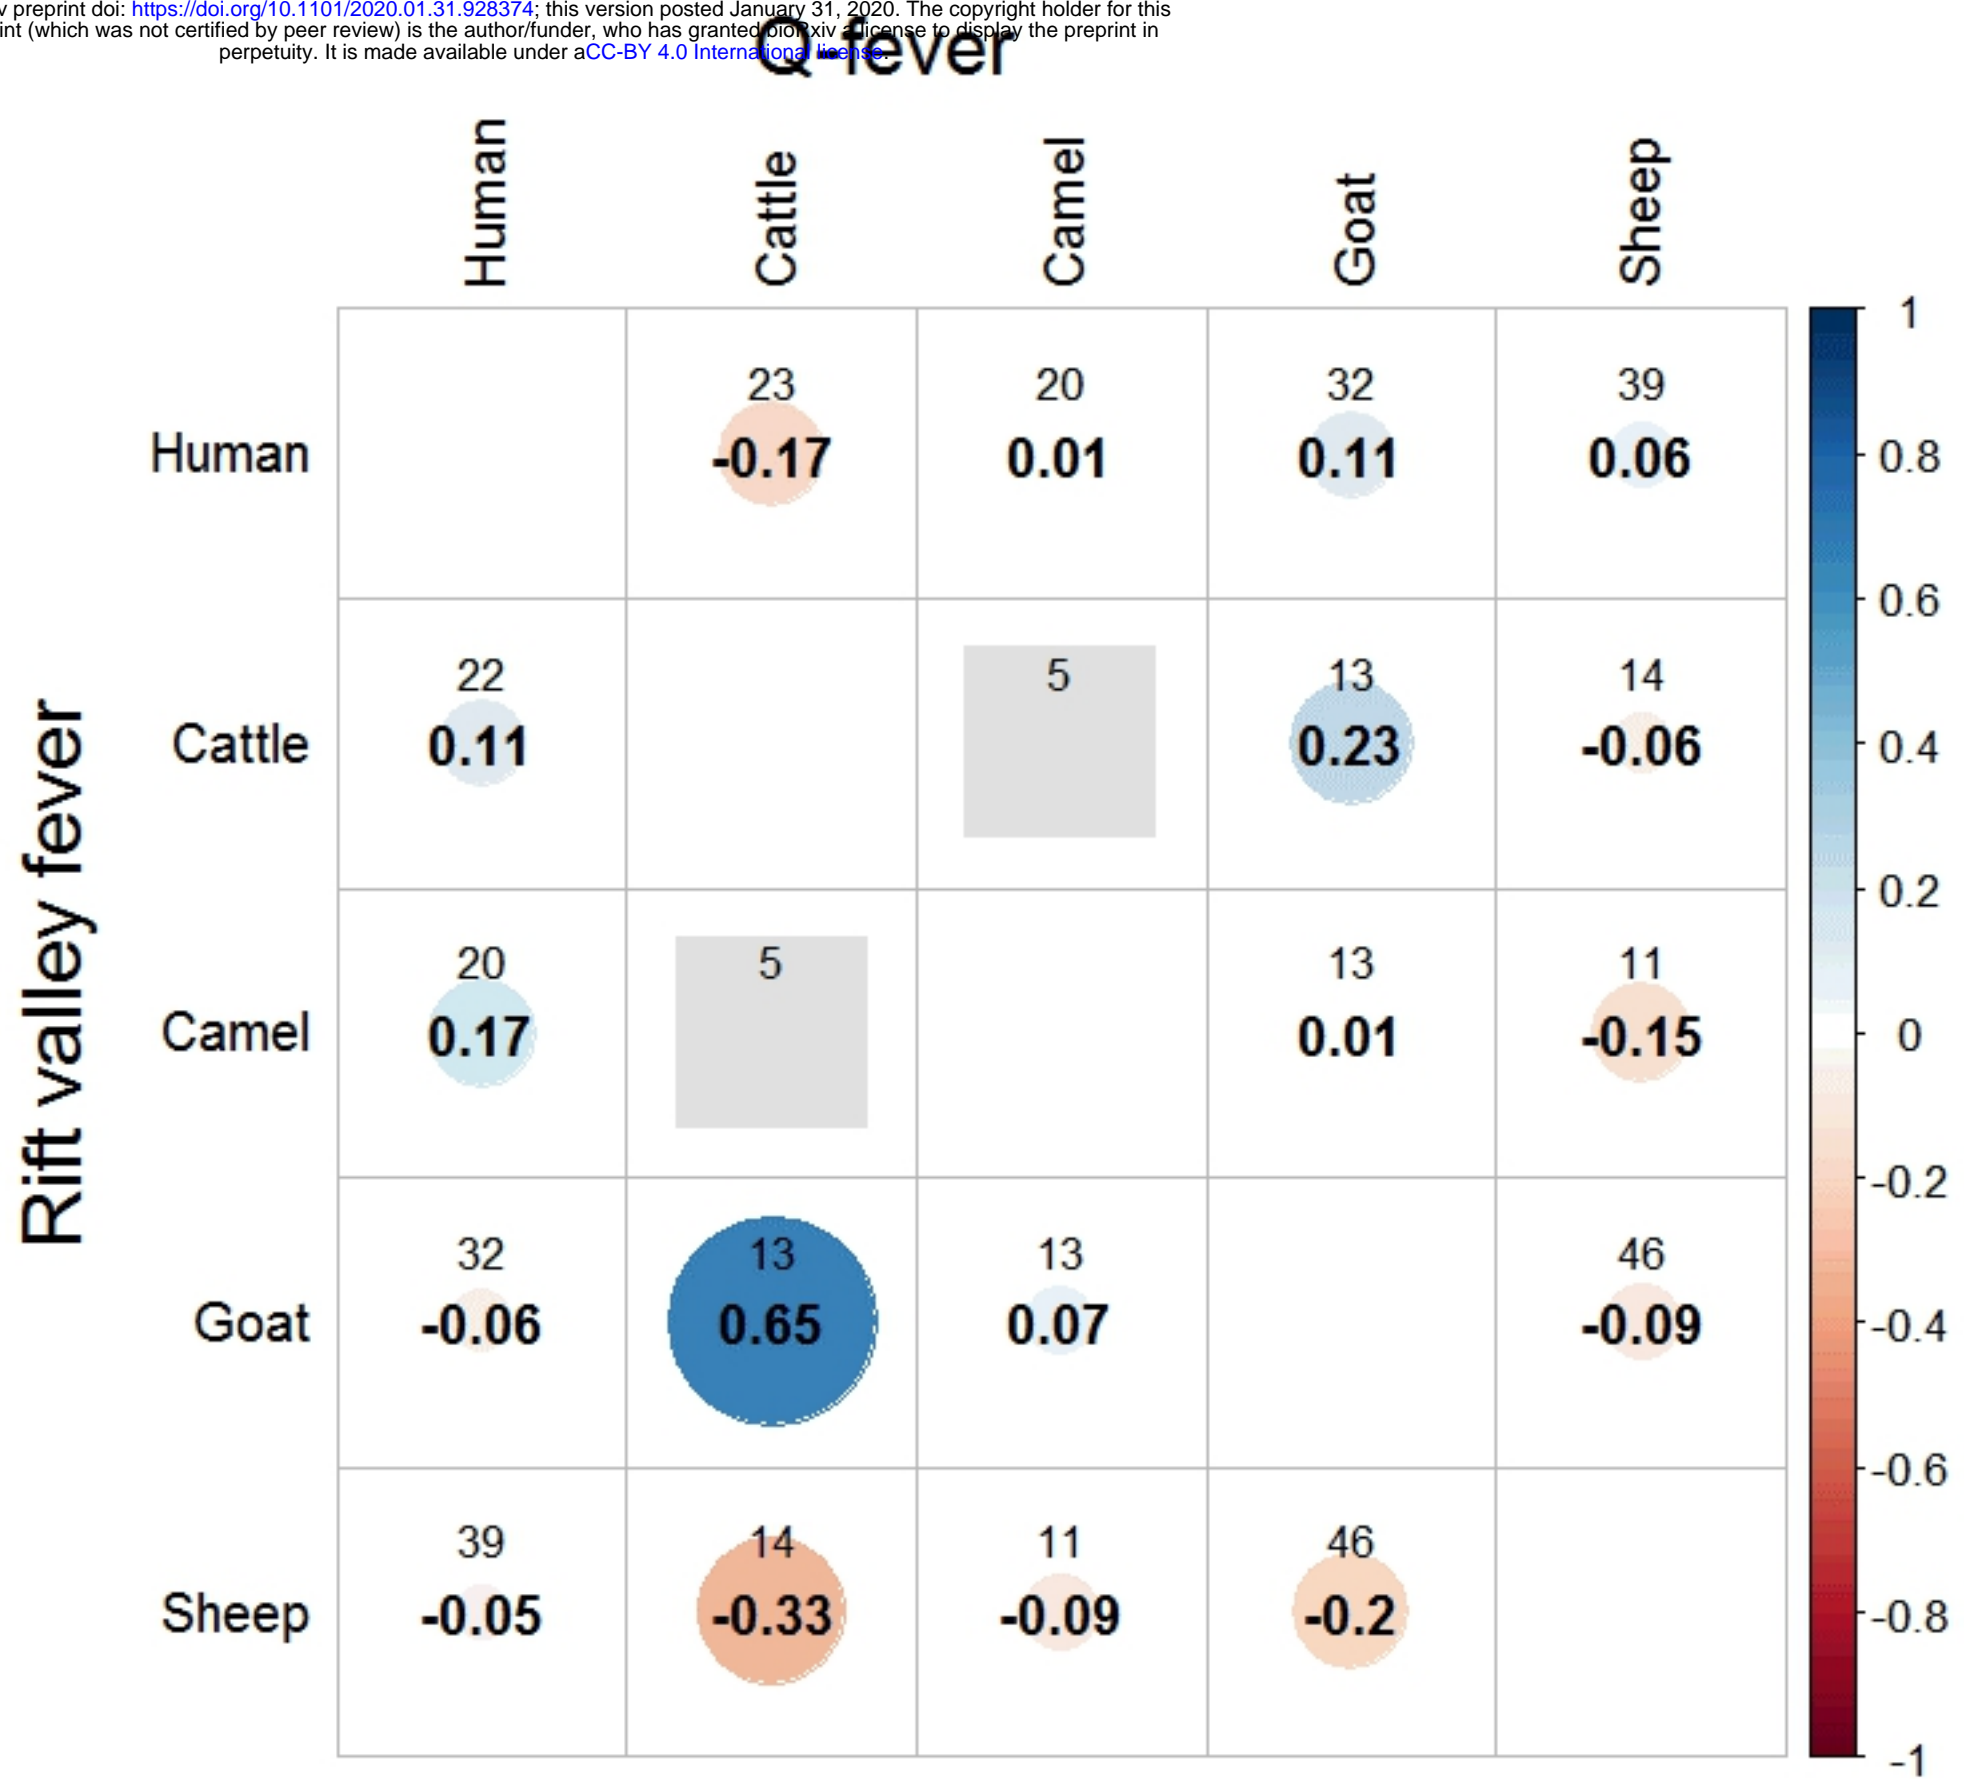

Figure
